# Supplementary material for: Changes in Causes of Maternal Mortality in Zimbabwe 2007-08 to 2018-19: Findings From Two Reproductive Age Mortality Surveys
Source: Research Square preprint supplement (doi:10.21203/rs.3.rs-1217517/v1), 2022-01-25
Supplement: Supplementary file 1 [file 4f5c00d37d46eb1717afb0dc.docx]

**Zimbabwe Maternal and Perinatal Mortality Study (ZMPMS) Group Members**

| **ZMPMS 2007-8 Group**  Stephen Munjanja  Thulani Magwali  Gwendoline Kandawasvika  Davidzoyashe Makosa  Maxwell Chirehwa  Eunice Tahuringana  Margaret Nyandoro  Aveneni Mangombe  Esther Ngaru  Tsitsi Magure  Nhamo Gona  Vongai Dondo  Ronald Mataya  Bothwell Guzha  Jonathan Kasule  Taurai Gunguwo  Sarah Manyame  Julius Chirengwa  Velda Mushangwe | **ZMPMS 2018-2019 Group**  Reuben Musarandega  Stephen Munjanja  Michael Nyakura  Thulani Magwali  Gerald Madziyire  Gwendoline Chimhini  Sunhurai Mukwambo  McMillan Parirenyatwa  Agnes Mahomva  Bernard Madzima  Davidzoyashe Makosa  Lucia Gondongwe  Chipo Chimamise  Winston Chirombe  Solwayo Ngwenya  Enesia Ziki  Mercy Gaza  Chipo Gwanzura  Admire Chikutiro  Rumbidzai Makoni  Grant Murewanhema |
| --- | --- |
